# Supplementary material
Source: publisher site journal article supplement (https://www.dovepress.com/article/418376)
Supplement: Supplementary file 1 [file get_supplementary_file.php]

**Appendix 1**

**LASSO formula based on seven significant radiomics features during the pre-NAC stage:**

y = 0.367 + 0.007*original_glrlm_GrayLevelNonUniformityNormalized - 0.029*logarithm_firstorder_Range - 0.004*squareroot_glrlm_RunVariance + 0.007*squareroot_glszm_GrayLevelVariance + 0.010*wavelet-HHH_glcm_ClusterTendency - 0.009*wavelet-LLL_firstorder_Median + 0.020*wavelet-LLL_ngtdm_Strength

**LASSO formula based on six significant radiomics features during the post-NAC stage:**

y = 0.367 - 0.072*logarithm_glcm_Imc1 + 0.067*squareroot_glszm_GrayLevelNonUniformity + 0.068*wavelet-HLL_firstorder_Variance + 0.102*wavelet-HLL_gldm_LargeDependenceLowGrayLevelEmphasis + 0.052*wavelet-HHH_glrlm_RunLengthNonUniformity + 0.110*wavelet-LLL_glszm_LargeAreaEmphasis

**Appendix 2**

**Prediction model formula for logistic regression based on six significant radiomics features during the post-NAC stage:**

y = sigmoid(0.21 * original_glrlm_GrayLevelNonUniformityNormalized - 0.66 * logarithm_firstorder_Range - 0.52 * squareroot_glrlm_RunVariance + 0.52 * squareroot_glszm_GrayLevelVariance + 0.41 * wavelet-HHH_glcm_ClusterTendency - 0.37 * wavelet-LLL_firstorder_Median + 0.98 * wavelet-LLL_glszm_LargeAreaEmphasis - 0.87)

The sigmoid function is an S-shaped function that maps any value to a range between 0 and 1. It's defined as sigmoid(x) = 1 / (1 + e^-x).

**Supplemental Figure Legend**


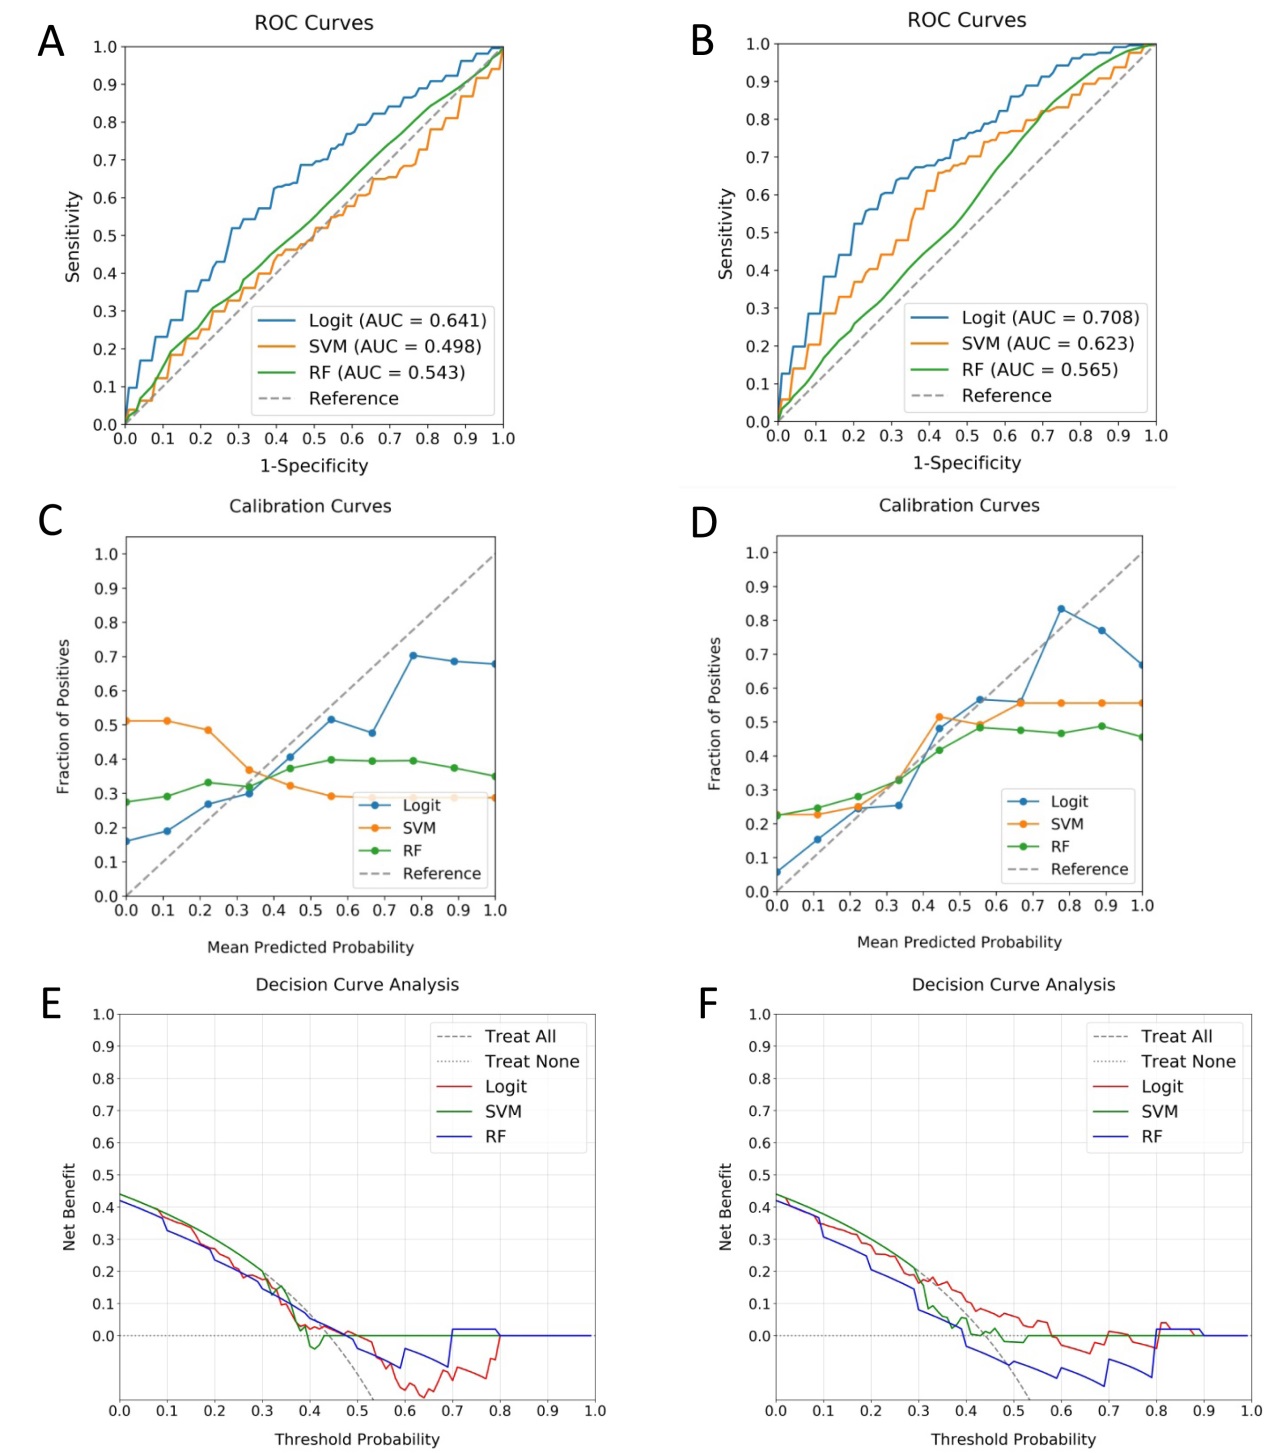


**Figure S1**. Comparison of the prediction performance of Logit, SVM, and RF classifiers using grayscale ultrasound radiomics features at pre- and early post-NAC stages. **Figures** **A**, **C**, and **E** present the ROC, calibration, and DCA curves for pre-NAC treatment predictions, respectively, indicating inferior discrimination with limited consistency and clinical applicability. Although the ROC (**Figure** **B**), calibration (**Figure** **D**), and DCA (**Figure** **F**) curves for early post-NAC treatment predictions exhibit improved performance, they still substantially underperform compared to ABVS radiomics features, with limited clinical utility. Logit: logistic regression, SVM: support vector machine, RF: random forest, ROC: receiver operating characteristic, DCA: decision curve analysis, NAC: neoadjuvant chemotherapy, ABVS: automated breast volume scanner.
